# Supplementary material
Source: publisher figshare collection journal article supplement (https://acs.figshare.com/ndownloader/files/6594771)
Supplement: Supplementary file 1 [file 6594771]

## Supplementary Information

### Increased Efficiency for Perovskite Photovoltaics via Doping the $\text{PbI}_2$ Layer

Sally Mabrouk<sup>1</sup>, Ashish Dubey<sup>1</sup>, Wenfeng Zhang<sup>1</sup>, Nirmal Adhikari<sup>1</sup>, Behzad Bahrami<sup>1</sup>, Md Nazmul Hasan<sup>1</sup>, Shangfeng Yang<sup>2\*</sup>, Qiquan Qiao<sup>1\*</sup>

<sup>1</sup>Center for Advanced Photovoltaics, Department of Electrical Engineering and Computer Science, South Dakota State University, Brookings, SD 57007  
Tel: 1-605-688-6965, Email: [Qiquan.Qiao@sdstate.edu](mailto:Qiquan.Qiao@sdstate.edu)

<sup>2</sup>Hefei National Laboratory for Physical Sciences at Microscale, Key Laboratory of Materials for Energy Conversion, Chinese Academy of Sciences, Department of Materials Science and Engineering, Synergetic Innovation Center of Quantum Information & Quantum Physics, University of Science and Technology of China (USTC), Hefei 230026, China  
Tel: +86-551-63601750, Email: [sfyang@ustc.edu.cn](mailto:sfyang@ustc.edu.cn)

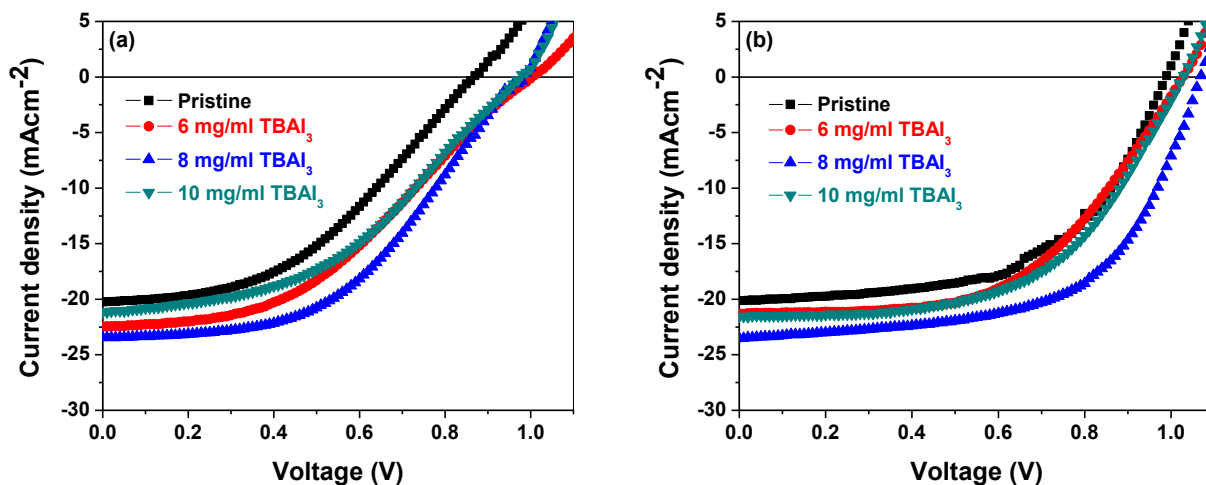

**Figure S1.** (a) Forward and (b) reverse current density-voltage (J-V) characteristics of perovskite solar cells made from pristine and different concentration (6, 8, 10 mg/ml) of TBAI<sub>3</sub> doped perovskite films.

**Table S1.** Photovoltaic parameters of fabricated perovskite solar cells made from pristine and different concentration (6, 8, 10 mg/ml) of TBAI<sub>3</sub> doped perovskite films.

| Devices                              | Scan    | Jsc (mAcm <sup>-2</sup> ) | Voc (V) | FF   | η (%)  |
|--------------------------------------|---------|---------------------------|---------|------|--------|
| <b>Pristine</b>                      | Forward | 20.25                     | 0.87    | 0.43 | 7.6%   |
|                                      | Reverse | 20.12                     | 0.99    | 0.56 | 11.18% |
| <b>6 mg/ml<br/>TBAI<sub>3</sub></b>  | Forward | 22.48                     | 1.00    | 0.41 | 9.28%  |
|                                      | Reverse | 21.27                     | 1.03    | 0.54 | 11.75% |
| <b>8 mg/ml<br/>TBAI<sub>3</sub></b>  | Forward | 23.45                     | 0.99    | 0.47 | 10.92% |
|                                      | Reverse | 23.52                     | 1.07    | 0.59 | 14.85% |
| <b>10 mg/ml<br/>TBAI<sub>3</sub></b> | Forward | 21.16                     | 0.98    | 0.43 | 9.00%  |
|                                      | Reverse | 21.59                     | 1.03    | 0.55 | 12.27% |

Figure S1 shows the J-V characteristics of perovskite solar cells made from pristine and perovskite films doped with different concentrations (6, 8, 10 mg/ml) of TBAI<sub>3</sub> in the PbI<sub>2</sub> precursor. Table S1 shows photovoltaic parameters including short circuit current density (J<sub>sc</sub>), open circuit voltage (V<sub>oc</sub>), fill factor (FF) and efficiency (η) obtained from the fabricated solar cells. It was observed that by increasing concentration of TBAI<sub>3</sub> additive in perovskite films, there was enhancement in J<sub>sc</sub>, V<sub>oc</sub> and η up to 8mg/ml compared to solar cells made from pristine perovskite films, beyond 8mg/ml, these parameters start to decrease. An optimum efficiency (η) of 14.85% was observed for the 8 mg/ml TBAI<sub>3</sub> doped perovskite based device, which is significantly improved as compared to the efficiency of 11.18% obtained from device made from pristine perovskite films.
